# Supplementary material for: DLC1 is the principal biologically-relevant down-regulated DLC family member in several cancers
Source: PubMed Central journal article supplement (PMC5216712; doi:10.18632/oncotarget.9266), 2016-05-10
Supplement: oncotarget-07-45144-s001.pdf [file oncotarget-07-45144-s001.pdf]

## SUPPLEMENTARY FIGURES

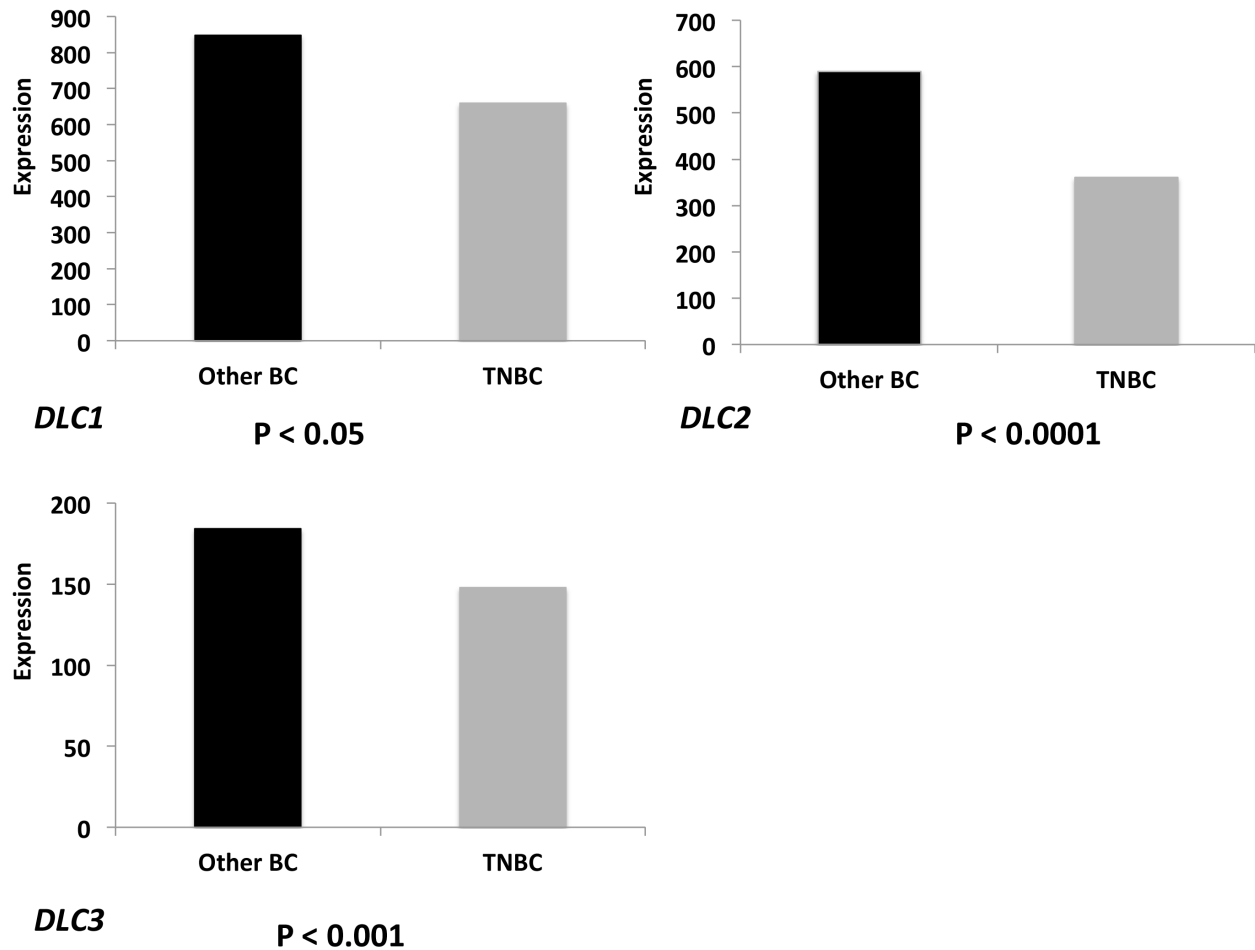

**Supplementary Figure S1: *DLC* Gene expression comparison between triple-negative and non-triple-negative breast cancers.** Statistical analysis was performed to compare *DLC1*, *DLC2* and *DLC3* expression in TCGA breast invasive cancer RNA-Seq dataset combined with clinical data. Medians of *DLC1*, *DLC2* and *DLC3* mRNA expression of triple-negative breast cancer (TNBC) and non-triple-negative cancer (Other BC) were calculated and the expressions were compared using Mann-Whitney U test. TNBC n = 112. Other BC n = 761.

**A** **DLC1 (variant 2) NM\_006904 Chromosome 8: 12990095-12991174 (GRCh37)**

gtcgcgcccccctcgagccagagccgcgagccccgccggctcaaggaggaaagtgaaccagggtctcccttcacgggttgcgaccgatccggagcccgcctggctgcgtggcccgcg  
gtccccaggcaaaaggaatcaagagtcactcctccaaaattcaaacctcccccacacacaccccaagaaaaatccggagactctgcagaaagcgt  
ttaaagagcacagaacaggcaccgacttgacaagggcggtgacacttctcgccgccccctccgagcccgctcccgccgcccagccgagcccaagcgaagcttagcttacGT  
GTTAGGATCATGGTGTCCGGCTTTCTTTCACATCAAGCACGGCAGGCGGGCGGGAAGCGCTGTGGGAAAGTCGAGGCAGGCGGAGGCGGCTCGGCTTCGCGTCGGGACCCACGGCG  
GCACCCGAGACGGCGCCCTCGCGTCTCAACGCATCTTTCCTCGCCGCTCCCTGCCCCCTCGTCACGGCCCAAGAAAGAAAGCGGGTTTTCTAAAGATCGAAACGAGGGAGCGCTCAG  
GGATTGGCGAGAAAGTCCTGAGCCGGGCTCTGATGCGGAGAGGTGCGGCATGCTCTGGCTGGGAGCGAAGCCCTCGCTCGGCGAGTCGGAGCGAAGTCTCCCGCGctcc  
gccagccggccctcccgctggccccccccggggggggggcagagccggccagccgctcctcccgtgtctgggtcgcagggccttagcagccggctgttctccggccccgc  
ccattcccaggctccgcccccccccctctctctgtggccgagcctcaggccgccccttagccccgccccaggccccgctctctctgtccgccccctgggttcccccttc  
ccccgccccccccgcccctctccgccaaggtggaatgtttccccacgggctccaggttccagcgggaagcgcgaaaaagtcgcaaacatttggccccgggtgcaaaagcaaa

**B** **DLC2α (variant 1) NM\_178006 Chromosome 13:33860701-33858962 (GRCh37)**

aatgggtccttagcaggttgatgacagtatctttgaagtacctttgcaactctgcagtgattcttcttaaatgattcagtgctttaaagtgataggcacttctaagttatctacc  
tctaggtgattaaaaattggggaagttagagaaatcaaagaggaaaggtgcttaatacgtaacgctgtgtactttgacctctgagcttctctgtaagaccctcaattccatcac  
gtgagggcagagatctgtgtgattcactcctggtgtaaaagccctgaagtttattttcactggaaaagttttatttgagttgttcttgataaggaaggtgggttacgctca  
gctgttgatgctgtttgaagtagtttttttgggtgtgtgtttttaaatttaagagattatcaggtccacttttaccctgctgctgtccctgtagaagcgaaggagcctt  
ctcaactttgacagcgtgaaagtttctgagccctgagctgtttgtctctactgttttgcctcctctctcttttcttctgactcctttagtgagggtgcttttgggtgt  
tctgagctctgagccagcgaatacgtgtattttctcagcgtgtgtgagggaccctggcggtggaactgctctggtcgggcttagggctgactgcaaacgttccattttc  
ctctctctctctctggttccgaggtcagctgagggccccggggttgaattctgagttgtgcttggcactcctcttcttttTAAAAATCGTGGTCTGTGTGAGCTGCTCTGG  
GCTGGTGTCTGTCTTTGACTGAGACTGGAGACAGACGGCAACAGCCACAGGCAGACTGAGGTGGCAATAGGAAATCTGCCGAGATGTTAGTCAAGTGCACAGGACCCACGGCTCAG  
GCTGCTACTACTAAATTCATGACACTGAGGGCCAGGAGATGTACTTGCATTGATCAGACTACAAGACGCTCTCTTACAGGATGAGCCGGATTCTAGCACGCCATCAGCTAGTGA  
CTAAAAATCAACAAAGtgagtgccgagcagtggaagcgtgtgtctcattctgatttctgttggcctatttcatgctaacaccagtttttttgggtgtttgtttccactttataacat  
ggatttctatgcccacactaccgtaactttgaaaaataactttagcctgagttttcagcaaacaggacagctcttagctgccacatagctcaacataaagtgcaaaaaaacctcaggg  
tggagcagtgatcataaattccaaactgacgtgtgtctacagaacagatgagaactgttactcagtggtatcttaggagctttctcaggttctcctcacactccgtcacatttaaaa  
tgtggacactgtttattcttagggaggagcagggactaatgtccaccctgcccagagatttccaatatccttagtgaagaggagaaagcaagaattctgttctaaagccacc  
aggtaagcactagaatcgactctctctgtttgtatgtttgctcagcagtgccacagatgtgtaaatattgtttctctgtagagaataaaggtgtctctcatcctcaaaaa  
tcccgtaactgcacacaaaactcagcttcttaatgcaagagaagagaatattgatta

**C** **DLC3β variant 3 NM\_001142504 Chromosome X:67912911-67914230 (GRCh37)**

ctgcccagattaatgtctgccccaaaatttccatgcatttctctcggaggtagagttcagacttgggttaggggacagaagcctggggtattggggaagttgcagagccactggggc  
ctgagcaactagggaaggcagctctctgctcaaatcccaattatctggtttccccaccattggagatttcaactgaagttgtgtctctggacatccataaattatccgagcaag  
tcaactgaacccctccgggacatagcatatgtgtttaaattcccccaaacagtgccgagcattcagaactcaataaatattagctgtgtgctggccaagtcaactgctgagcctcag  
tctttgggcttgcaactcctccctggcagcgtgtgacccggaggaaagcagccgagggccttggaggacctgcagccagctgccccccaccagatttgggtgactttctggcga  
gtccggtggccagactgccccccattggcggaggggaggtggcggggctctcactagccctactcgcgagcctcctccacttgAGCTGAGTGGACTCGGTTGACACGGCT  
AAGCAGCCGCGGAGCTCTTCTGGCTGGCACCGTCAACCCTGCCCCAGCCAGGCCCCGCTGTGTCGGACGGAGCAGTCCCTCTGGGCTCGCCTCTGCCCTCGCTCTGTG  
TCAGGCCCGAACCAAAAGGGTGGACGGGCTCCAGgttaggagctggcgagcagggggagatccagacaaaagggggcctggggcctctccccgctttgctctctggc  
gcgctccggtcggccttctctagcggttccgccccggcggtacgcaagagacagggaggaagcagccagccacccccccctgggattgggggtcagaatcgcgaaattgg  
gggacccccgagccgagccgctctccagcaagcctcgcagttggggcggtaggaagcagctgtccgctgttaccgccccggcctgtgggtctcgcagcgtcgtctgggg  
tttggagggcgttgagctggccggggggcagagctcaggtctgttggcgggctgcccagatctctgcctcctctctctctctctgagggcatttccaggaagccccgct  
ccgctgtatgggttttccctgcccactgctcttctctctctcagaaatgcccagagactcttggatttaagatagctcggggccaagcgaacgtttggacagctctc

**Supplementary Figure S2: DLC promoter sequences.** The sequences of predominantly expressed *DLC* genes are used. **A.** *DLC1* variant 2. **B.** *DLC2* alpha, variant 1. **C.** *DLC3* beta, variant 3. The sequences of the first exons are highlighted with capital letters.

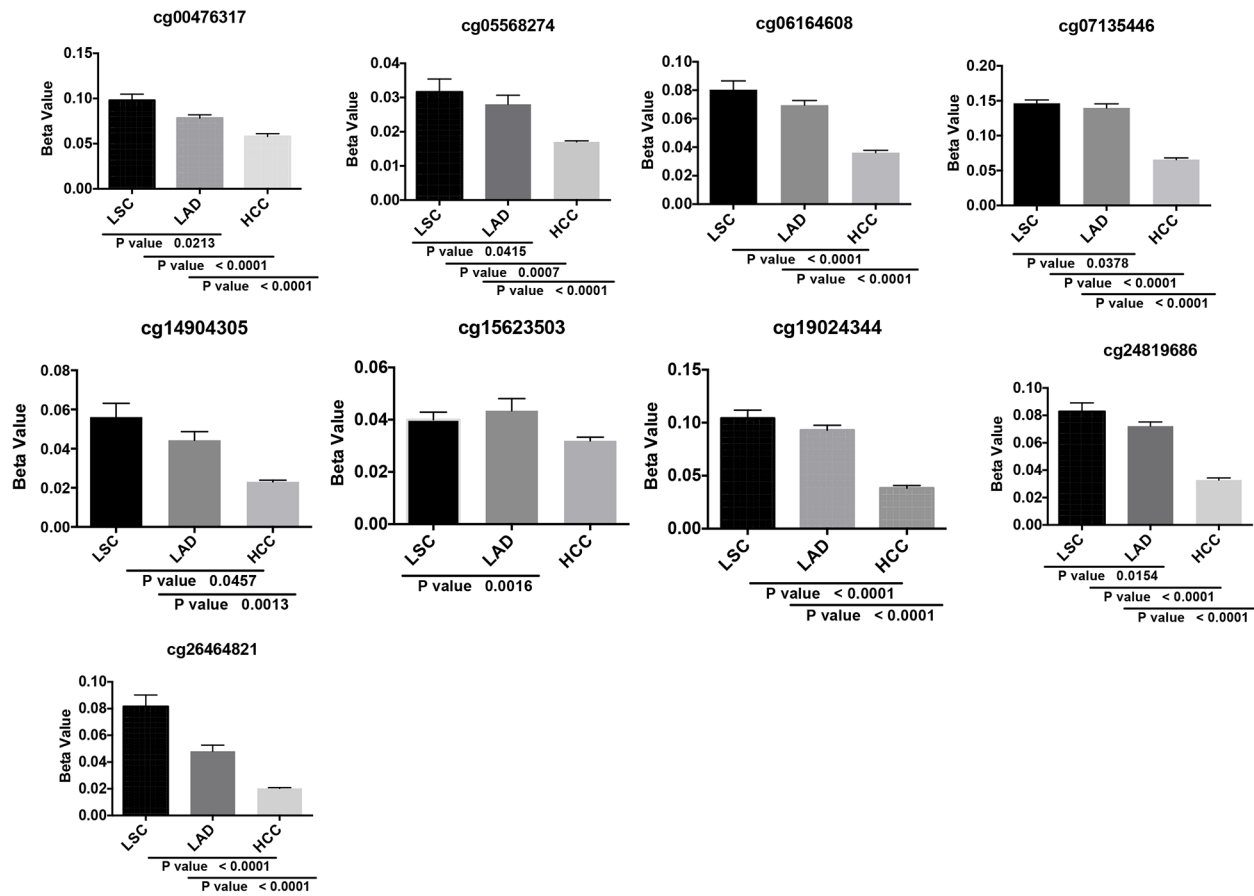

**Supplementary Figure S3: *DLC1* promoter methylation in LSC, LAD and HCC.** DNA methylation beta values of probes in selected regions were used for means and standard errors calculation. The result shows one of nine of *DLC1* promoter regions in LAD has higher methylation than LSC. Four of nine of *DLC1* promoter regions in LSC has higher methylation than LAD. Eight of nine of *DLC1* promoter regions in LSC and LAD have higher methylation than HCC.

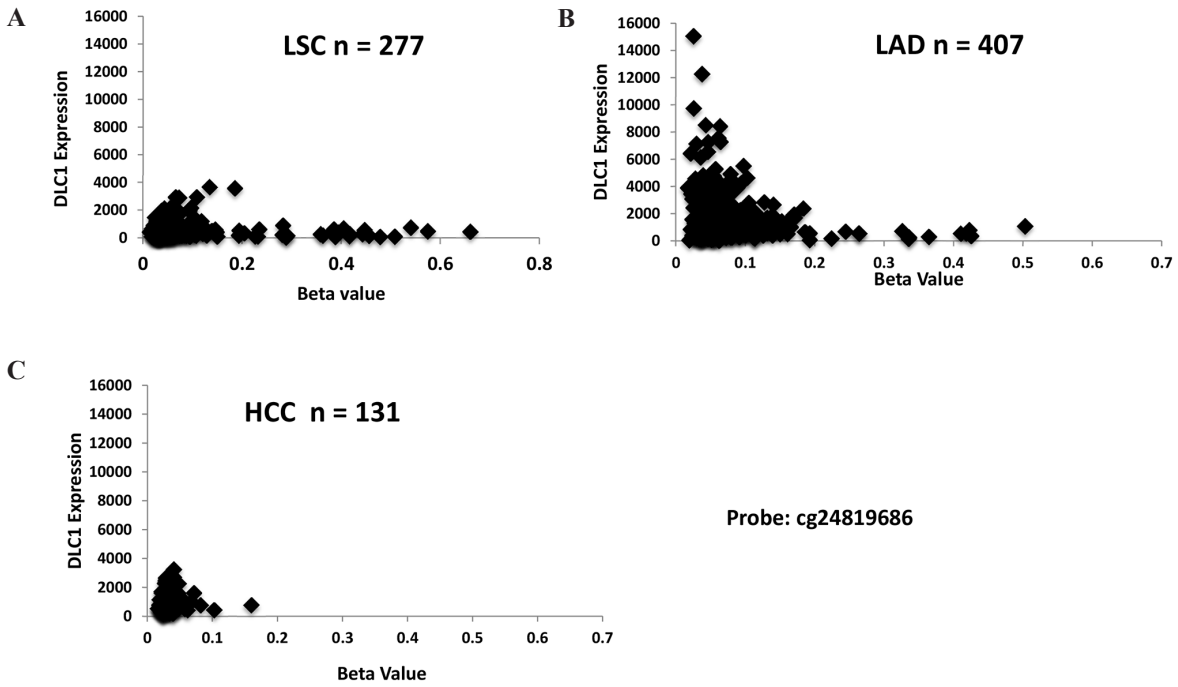

Supplementary Figure S4: Relationship between DNA methylation and *DLC1* expression in cancers. TCGA DNA methylation beta values from probe cg24819686 and *DLC1* RNA-Seq values are plotted for LSC A., LAD B. and HCC C.

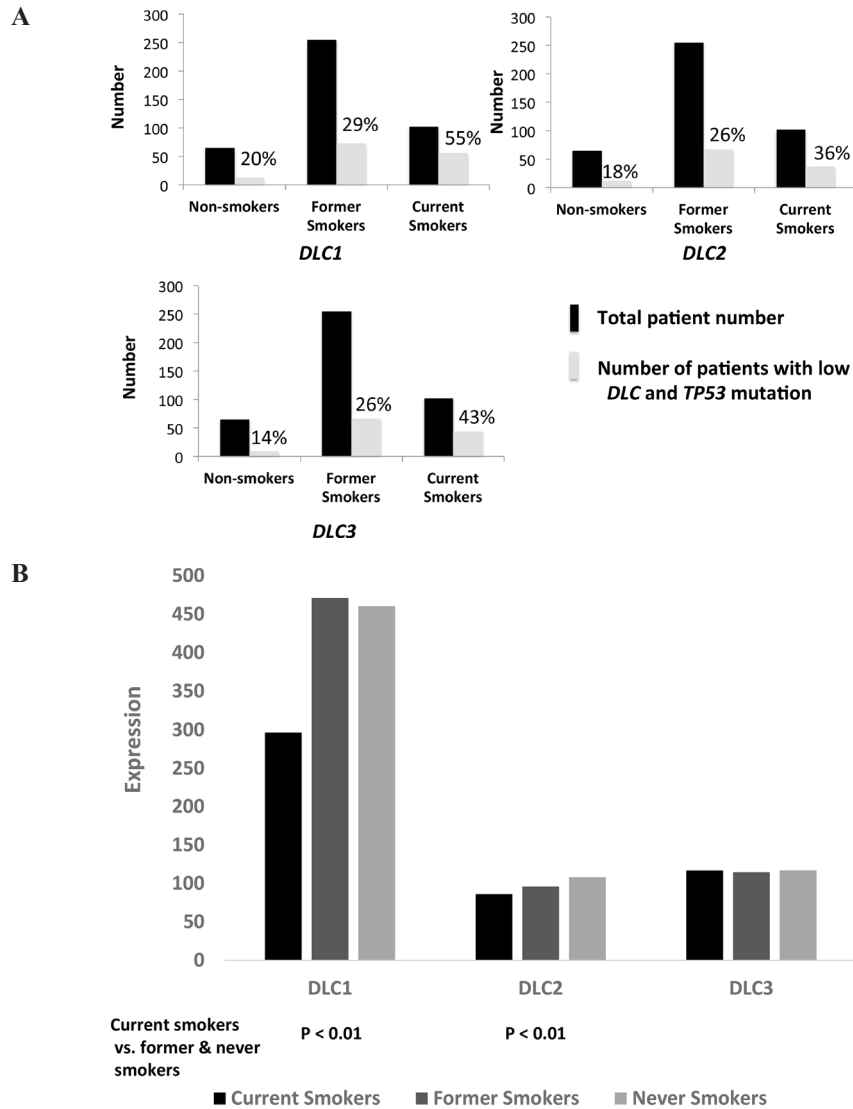

**Supplementary Figure S5: Combination of *DLC1* down-regulation and *TP53* mutation is related to smoking status in lung adenocarcinoma.** **A.** *DLC* expression and *TP53* mutations in smokers with lung adenocarcinoma from TCGA lung adenocarcinoma patients whose smoking history was known. The graph represents the number and percentage of cases in each smoker category that had both low *DLC1* mRNA expression and *TP53* mutation. **B.** Median *DLC* values of never smokers (n = 32), former smokers (n = 268), and current smokers (n = 49), from Director’s Challenge Lung Study cohort. (lung adenocarcinoma), was calculated and compared using Mann-Whitney U test. For *DLC1* and *DLC3*, both never smokers and former smokers have higher expression than current smokers.
